## 26 **ABSTRACT**

27 The fast skeletal muscle protein  $\alpha$ -actinin-3 is absent in 1.5 billion people worldwide due to  
28 homozygosity for a nonsense polymorphism in the *ACTN3* gene (R577X)<sup>1</sup>. The prevalence  
29 of the 577X allele increased as modern humans moved to colder climates, suggesting a link  
30 between  $\alpha$ -actinin-3 deficiency and improved cold tolerance<sup>1,2</sup>. Here, we show that humans  
31 lacking  $\alpha$ -actinin-3 (XX) are superior in maintaining core body temperature during cold-  
32 water immersion due to changes in skeletal muscle thermogenesis. Muscles of XX  
33 individuals displayed a shift towards more slow-twitch isoforms of myosin heavy chain  
34 (MyHC) and sarcoplasmic reticulum (SR) proteins, accompanied by altered neuronal muscle  
35 activation resulting in increased tone rather than overt shivering<sup>3,4</sup>. Experiments on *Actn3*  
36 knockout mice showed no alterations in brown adipose tissue (BAT) properties that could  
37 explain the improved cold tolerance in XX individuals. Thus, this study provides a clear  
38 mechanism for the positive selection of the *ACTN3* X-allele in cold climates and supports a  
39 key thermogenic role of skeletal muscle during cold exposure in humans.

40

## 41 **Main**

42 The sarcomeric protein  $\alpha$ -actinin-3 resides in the Z-discs of fast skeletal muscle fibers, where  
43 it cross-links the actin filaments of adjacent sarcomeres<sup>5-7</sup>. The lack of functioning *ACTN3*  
44 does not cause muscle disease, but it has been shown to affect muscle function both in the  
45 general population and in athletes<sup>8,9</sup>; in general,  $\alpha$ -actinin-3 deficiency is detrimental for  
46 power and sprint activities<sup>8,10,11</sup>.

47 A study exploring evolutionary implications of  $\alpha$ -actinin-3 deficiency demonstrated  
48 that the X-allele became more abundant as humans migrated out of Africa into the colder  
49 climates of central and northern Europe<sup>1,2,12</sup>. This led to the hypothesis that  $\alpha$ -actinin-3  
50 deficient humans are superior in adapting to lower temperature<sup>2</sup>. On this basis, we sought to  
51 determine whether  $\alpha$ -actinin-3 deficient (XX) humans were better at defending their body  
52 temperature during an acute cold challenge than humans with functioning *ACTN3* (RR).  
53 Young male XX and RR individuals (Supplementary Table 1) were immersed in 14 °C water  
54 for 20 min periods interposed by 10 min pauses in room-temperatured air; cold-water exposure  
55 was continued until the rectal temperature reached 35.5 °C or for a total of 120 min (170 min  
56 including the pauses). The percentage of individuals able to maintain their body temperature  
57 above 35.5 °C degrees for the complete cold-water exposure was markedly higher in the XX  
58 group (69%) than in the RR group (30%) (Fig. 1A). The average rate of decline of rectal ( $T_{re}$ )  
59 and gastrocnemius muscle ( $T_{mu}$ ) temperatures in XX subjects was about half of that in RR

60 subjects (Fig. 1B and 1C). The rate of skin temperature ( $T_{sk}$ ) decline, on the other hand, was  
61 not significantly different between the two groups (Fig. 1D). The overall increase in energy  
62 consumption induced by the cold challenge was assessed by measurements of heart rate and  
63 the rate of respiratory  $O_2$  uptake ( $VO_2$ ) and  $CO_2$  exhalation ( $VCO_2$ ); all three rates were  
64 significantly increased at the end of cold exposure irrespective of ACTN3 genotype (Fig. 1E-  
65 G). Thus,  $\alpha$ -actinin-3 deficient individuals showed superior protection of core body  
66 temperature during an acute cold stress and this was achieved without increased energy  
67 consumption as judged from similar cold-induced increases in heart rate,  $VO_2$  and  $VCO_2$  in  
68 XX and RR individuals.  
69

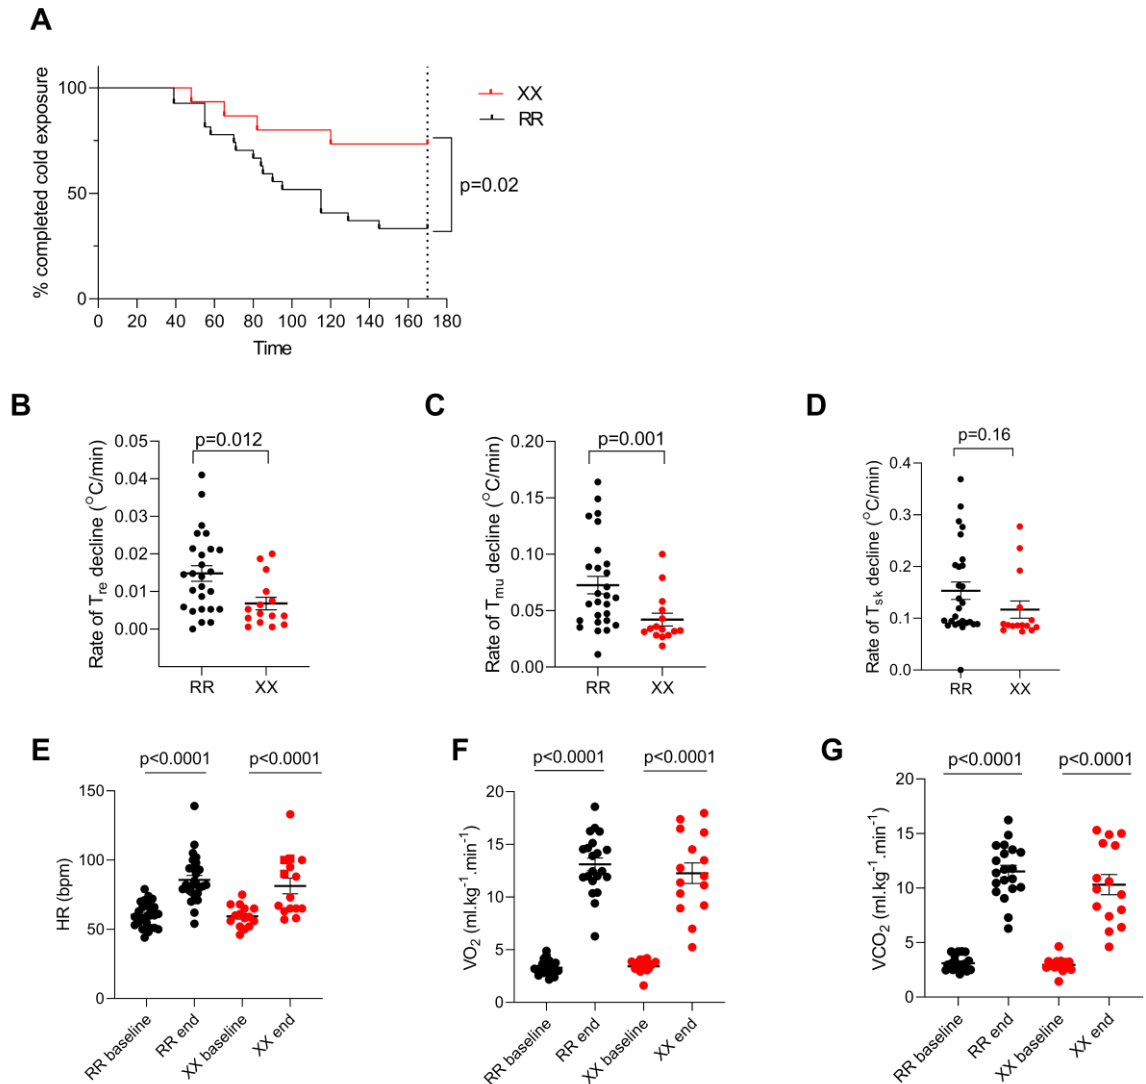

70

71 **Fig. 1. Temperature measurements and physiological responses during cold-water**  
 72 **immersion.** A) Survival plot of the time taken to reach a rectal temperature ( $T_{re}$ ) of  $35.5^{\circ}\text{C}$   
 73 or sustaining the complete 170 min period of cold-water immersion in RR ( $n = 27$ ) and XX ( $n$   
 74  $= 15$ ) individuals. Log-rank (Mantel-COX) test was used to assess statistical difference  
 75 between RR and XX individuals. The decline rate in rectal ( $T_{re}$ ; B), intramuscular ( $T_{mu}$ ; C)  
 76 and skin ( $T_{sk}$ ; D) temperatures in RR and XX subjects. Statistical difference between the two  
 77 groups was assessed with unpaired t-test. Heart rate (E) and rate of pulmonary  $\text{O}_2$  uptake  
 78 ( $\text{VO}_2$ , F) and  $\text{CO}_2$  exhalation ( $\text{VCO}_2$ , G) before (baseline) and at the end of cold-water  
 79 immersion in RR and XX subjects. Statistical assessment with 2-way RM ANOVA revealed no  
 80 differences between the two groups either before or at the end of cold-water exposure. Plots  
 81 show values for each RR (black circles) and XX (red circles) individual and mean  $\pm$  SEM.

82

83 In mice, *Actn3* knockout (KO) results in changes in intracellular  $\text{Ca}^{2+}$  handling with marked  
84 increases in SR  $\text{Ca}^{2+}$  leak and the subsequent heat-generating active SR  $\text{Ca}^{2+}$  re-uptake via  
85 the SR  $\text{Ca}^{2+}$ -ATPase (SERCA)<sup>13</sup>. Uncoupling of SERCA activity from the actual  $\text{Ca}^{2+}$   
86 transport into the SR is considered a key component in muscular non-shivering  
87 thermogenesis<sup>14-17</sup>. SERCA is expressed in several different isoforms in mammalian tissues  
88 with SERCA1 and SERCA2a being the main isoforms in adult fast-twitch and slow-twitch  
89 muscle fibers, respectively<sup>18-20</sup>. Notably, we detected a shift in dominance from SERCA1 in  
90 RR muscles to SERCA2a in XX muscles (Fig. 2A-B). The SR  $\text{Ca}^{2+}$  storage protein,  
91 calsequestrin (CSQ), also shows a fiber type-dependent isoform distribution with CSQ1  
92 dominating in fast-twitch fibers and CSQ2 in slow-twitch fibers<sup>19,21</sup>. We observed similar  
93 total CSQ expression in XX and RR muscles, whereas the expression of CSQ2 was about  
94 twice as high in XX compared to RR muscles (Fig. 2C-D). The difference in SERCA and  
95 CSQ isoform expression between XX and RR muscles may reflect a larger volume of the  
96 muscle to be composed of slow-twitch fibers in XX than in RR subjects. Therefore, we used  
97 high-sensitivity silver staining to analyze the MyHC composition and found that XX muscles  
98 had significantly more slow MyHC I ( $\beta$ -MyHC) and less fast MyHC IIX than RR muscles  
99 (Fig. 2E).

100 The sarcomeric  $\alpha$ -actinins are known to interact with a multitude of functionally  
101 diverse proteins involved in structural, metabolic, signaling, and  $\text{Ca}^{2+}$ -handling pathways<sup>10</sup>.  
102 We used proteomics as an exploratory measure to look for further differences in muscle  
103 between XX and RR individuals. This proteomic analysis of skeletal muscle biopsies shows  
104 distinct differences in protein abundance between XX and RR individuals. Overall, we found  
105 42 proteins to be differentially expressed between genotypes (Fig. 2F), including higher  
106 protein levels of slow-twitch muscle fiber markers (MyHC I (MYH7), slow-type myosin-  
107 binding protein C (MYBPC1), SERCA2) and lower levels of fast-twitch markers (myosin  
108 light chain 1/3 (MYL1), myosin regulatory light chain 2 (MYLRF2), fast-type muscle troponin  
109 T (TNNT3)) in XX than in RR individuals (Fig. 2G). Furthermore, pathway analysis revealed  
110 that differentially expressed proteins were enriched in pyruvate metabolism ( $P = 0.0003$ ;  
111 FDR = 0.02), including pyruvate dehydrogenase (PDHA1) with an ~60% higher protein  
112 expression in XX than in RR individuals.

113

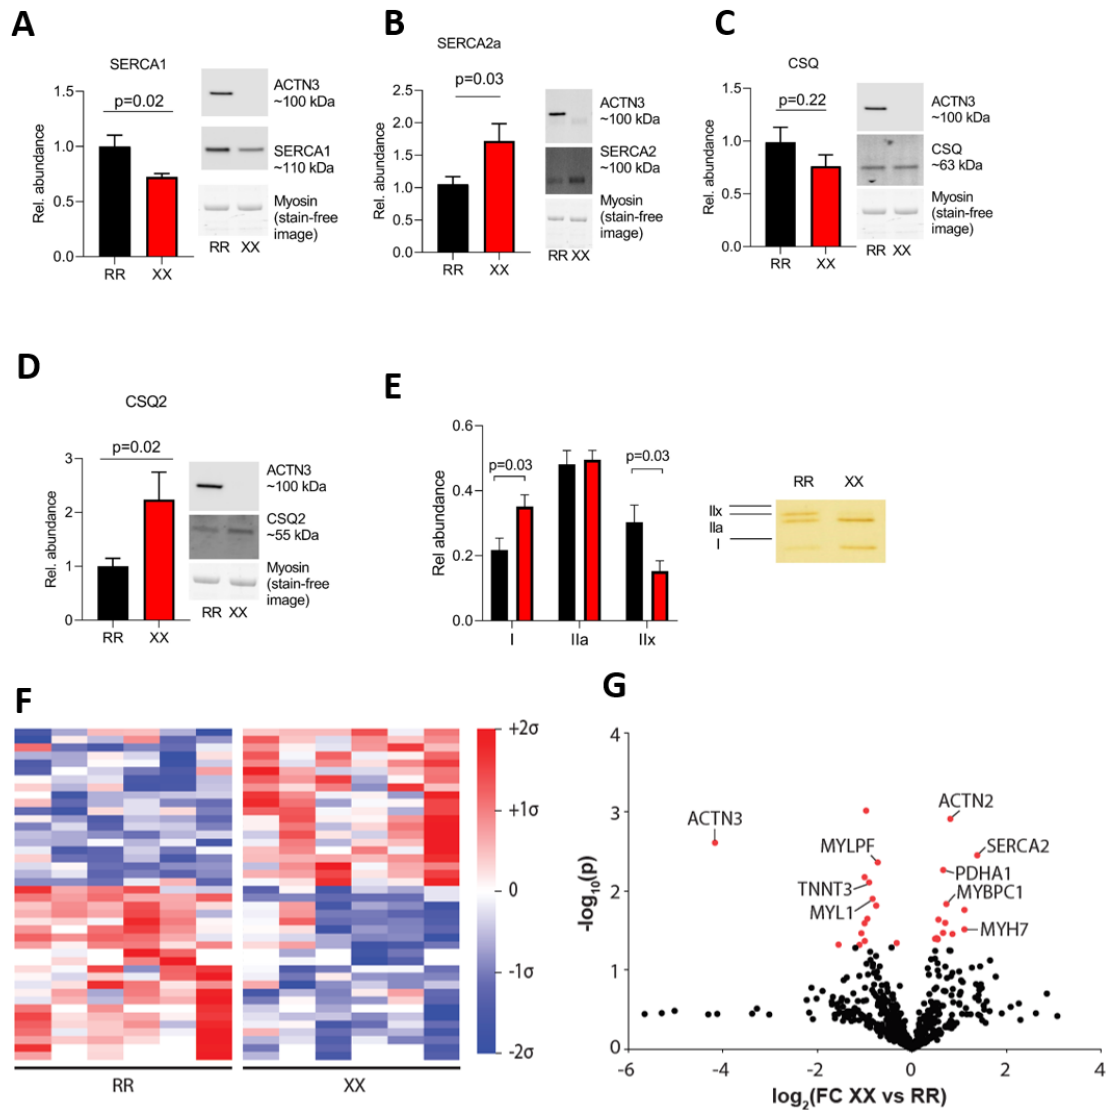

114

115 **Fig. 2. ACTN3 deficiency is accompanied by a shift towards a slower skeletal muscle**

116 **phenotype.** Summary data (mean  $\pm$  SEM) and representative western blots of the SR  $Ca^{2+}$ -

117 handling proteins SERCA1 (A), SERCA2a (B), CSQ (C), and CSQ2 (D) in muscle of RR ( $n =$

118 8) and XX ( $n = 7$ ) individuals. Band intensities were normalized to their respective myosin

119 loading controls. Data expressed relative to the mean value of the RR group, which was set to

120 1.0. Statistical difference between the two groups was assessed with unpaired t-test. E) Silver

121 stained gels were used to assess the distribution of MyHC isoforms in RR ( $n = 7$ ) and XX ( $n$

122 = 7) individuals. Right part shows a representative example of the distribution of MyHC in

123 RR and XX individuals. The total staining of the three MyHC bands was set to 1 in each

124 subject. Statistical difference between the two groups was tested with unpaired t-test. F)

125 Mean-centered sigma-normalized heatmap of differentially expressed proteins ( $P < 0.05$ ). G)

126 Volcano plot of all identified proteins ( $n = 601$ ) expressed as fold-change (FC) in XX

127 compared to RR individuals. Differentially abundant proteins are indicated in red.

128

129 Although the difference in SERCA and CSQ isoform expression between XX and RR muscle  
130 homogenates corresponds with the MyHC distributions,  $\alpha$ -actinin-3 deficiency might still  
131 affect the abundance of these  $\text{Ca}^{2+}$ -handling proteins within individual fiber types. However,  
132 fiber type-specific western blots performed on pooled single muscle fibers did not reveal any  
133 fiber type-dependent differences in the expression of SERCA1, total CSQ or CSQ2 between  
134 XX and RR muscles (Supplementary Fig. 1). Intriguingly, SERCA2a was higher in the RR  
135 than in XX Type I fibers, which might indicate that the abundance of SERCAs is not the  
136 limiting factor in temperature regulation. SERCA might be involved in muscular non-  
137 shivering thermogenesis via its associated protein sarcolipin (SLN), which interferes with  
138 SERCA function by mediating uncoupling of the SR  $\text{Ca}^{2+}$  uptake from the heat-generating  
139 ATP hydrolysis<sup>15,22</sup>. Hence, we measured SLN expression in muscle homogenates and in  
140 pooled single fibers, and the results showed no difference in SLN expression between XX  
141 and RR muscles (Supplementary Fig. 2 and Supplementary Fig. 3). Another potential  $\text{Ca}^{2+}$ -  
142 SR-related mechanism for heat generation is  $\text{Ca}^{2+}$  leak through the SR  $\text{Ca}^{2+}$  release channel,  
143 the ryanodine receptor 1 (RyR1) channel complex, due to dissociation of the channel-  
144 stabilizing subunit FK506 binding protein (FKBP12)<sup>23,24</sup>. However, immunoprecipitation  
145 experiments did not reveal any difference in the amount of FKBP12 bound to RyR1 between  
146 XX and RR muscles (Supplementary Fig. 2B). To summarize, we could not detect any SR  
147  $\text{Ca}^{2+}$ -handling protein-dependent explanation for the superior cold tolerance of XX subjects.

148 Brown adipose tissue is an important heat-producing thermo-effector in mammals<sup>25</sup>.  
149 However, adult humans have relatively little brown adipose tissue (BAT) and it is therefore  
150 difficult to assess its role as a heat generator<sup>26</sup>. We utilized the well-defined *Actn3* KO  
151 mouse model to examine the impact of BAT activation as a mechanism for improved heat  
152 generation in  $\alpha$ -actinin-3 deficient individuals<sup>1</sup>. Wildtype (WT) and *Actn3* KO mice were  
153 kept in a cold (4 °C) room for 5 hours and core body temperature was measured at regular  
154 intervals using a rectal probe. In accordance with the human results, the number of mice able  
155 to maintain their body temperature above 35.5°C for the cold exposure period was markedly  
156 higher in the *Actn3* KO (41%) than in the WT (16%) group (Fig. 3A). Although the overall  
157 rate of temperature decline during cold exposure was not significantly different between the  
158 two groups (Fig. 3B), *Actn3* KO mice were significantly lighter than their WT counterparts  
159 (Fig. 3C) and therefore showed an improved cold tolerance after normalizing for body weight  
160 (Fig. 3D). Following cold exposure, *Actn3* mRNA was present in BAT of WT mice, but  
161 absent in the KO mice (Fig. 3E). RNA-sequencing was performed on BAT collected from

162 mice subjected to either thermal neutrality (TN, 30 °C), room temperature (RT, 22 °C) or low  
163 temperature (cold, 4 °C). An unbiased principal component analysis (PCA) and heat map  
164 clustering separated samples based on temperature (TN, RT and cold), whereas it showed no  
165 effect of *Actn3* genotype (Fig. 3F and G). Further analysis showed over 2000 differentially  
166 expressed genes in BAT following cold exposure (Fig. 3H); however, only one transcript was  
167 significantly altered based on genotype and temperature (cold; glycine/arginine rich protein  
168 1; *Grrp1*), excluding physiologically relevant genotype-specific differences in BAT  
169 properties following acute cold exposure (Fig. 3I). To sum up, these data imply that the  
170 improved cold tolerance observed in  $\alpha$ -actinin-3 deficient humans and mice is due to  
171 improved skeletal muscle heat generation without any detectable influence of BAT.  
172



173

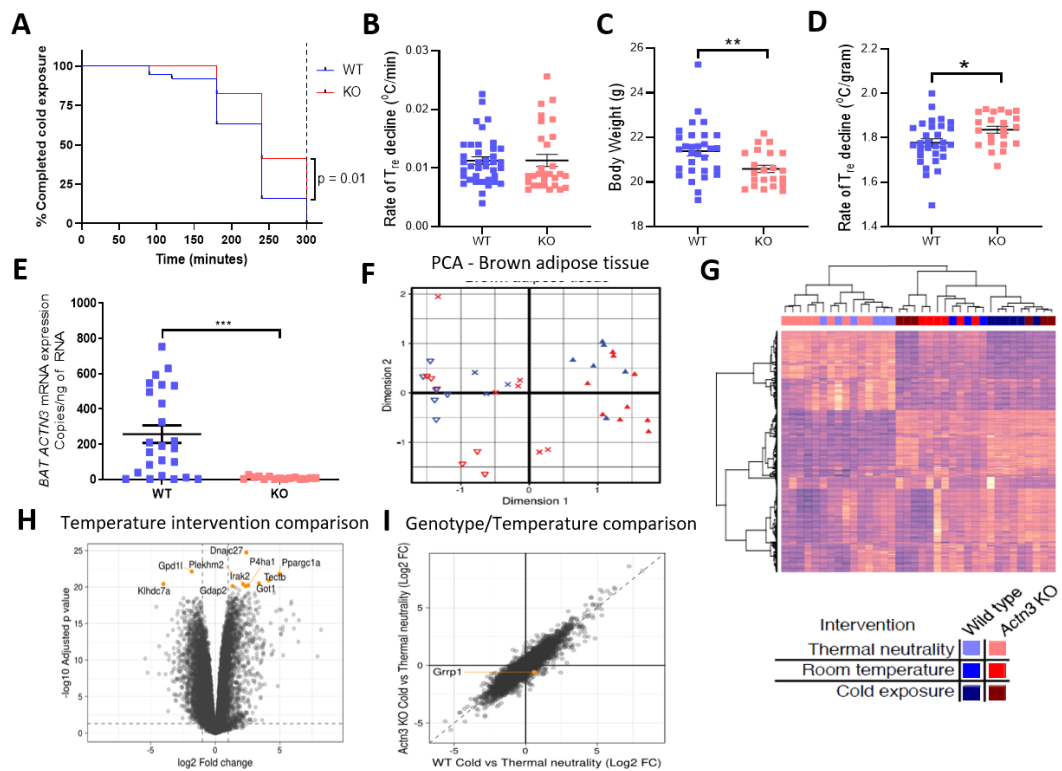

174

175

176 **Figure 3: Improved cold tolerance in *Actn3* KO mice not related to altered BAT**

177 **properties.** **A)** Survival plot of the time taken to reach  $35.5^{\circ}\text{C}$  core body temperature over a 5

178 hours period exposed to  $4^{\circ}\text{C}$  air temperature in WT ( $n = 38$ ) and *Actn3* KO ( $n = 29$ ) mice.

179 Log-rank (Mantel-COX) test was used to assess statistical difference between WT and KO

180 mice. The overall rate of decline in rectal body temperature (**B**), body weight (**C**) and rate of

181 rectal body temperature decline per g body weight (**D**). **E)** Following cold exposure, *Actn3*

182 mRNA is present in WT but not in *Actn3* KO mice. RNA-sequencing analyses show an effect

183 of temperature but no effect of *Actn3* genotype on BAT activation with both the principal

184 component analysis (PCA, **F**) and heat map (**G**). **H)** Volcano plot of altered genes confirms

185 that marked changes in BAT gene expression occurs following acute cold exposure, with

186  $>2000$  differentially expressed genes identified. **I)** Interaction plot shows no differences

187 based on *Actn3* genotype in BAT following acute cold exposure.  $*P < 0.05$ ,  $**P < 0.01$ ,  $***P$

188  $< 0.001$  with unpaired *t*-test.

189

190 The major heat-generating mechanism in mammalian skeletal muscle during an acute cold  
191 challenge is involuntary activation of motor units resulting in skeletal muscle contraction.  
192 This mechanism is generally referred to as shivering thermogenesis although it involves both  
193 increased basal muscle tone due to continuous low-intensity activation and overt shivering  
194 due to high-intensity bursting activity <sup>3</sup>. In our human cohort, we used surface  
195 electromyography (EMG) to follow the activation of pectoralis major muscles during cold-  
196 water immersion and observed more frequent bursting activity in RR individuals with mean  
197 data showing an approximately two times higher rate of bursts in RR than in XX muscles  
198 (Fig. 4A and B); the markedly higher activity during bursts also resulted in a slightly higher  
199 mean EMG signal frequency in RR muscles (Fig. 4C). On the other hand, there was no  
200 significant difference in the amplitude of the EMG signal, which reflects the overall number  
201 of muscle fibers being activated (Fig. 4D). Interestingly, cold-induced low-intensity  
202 continuous muscle activity is associated with activation of type I muscle fibers, whereas high-  
203 intensity burst activity is linked to recruitment of type II muscle fibers <sup>4,27,28</sup>. Thus, the  
204 difference in burst rate between XX and RR muscles is consistent with the difference in fiber  
205 type distribution with more type I and less type II MyHC in XX than in RR muscles (see Fig.  
206 2E).  
207

208

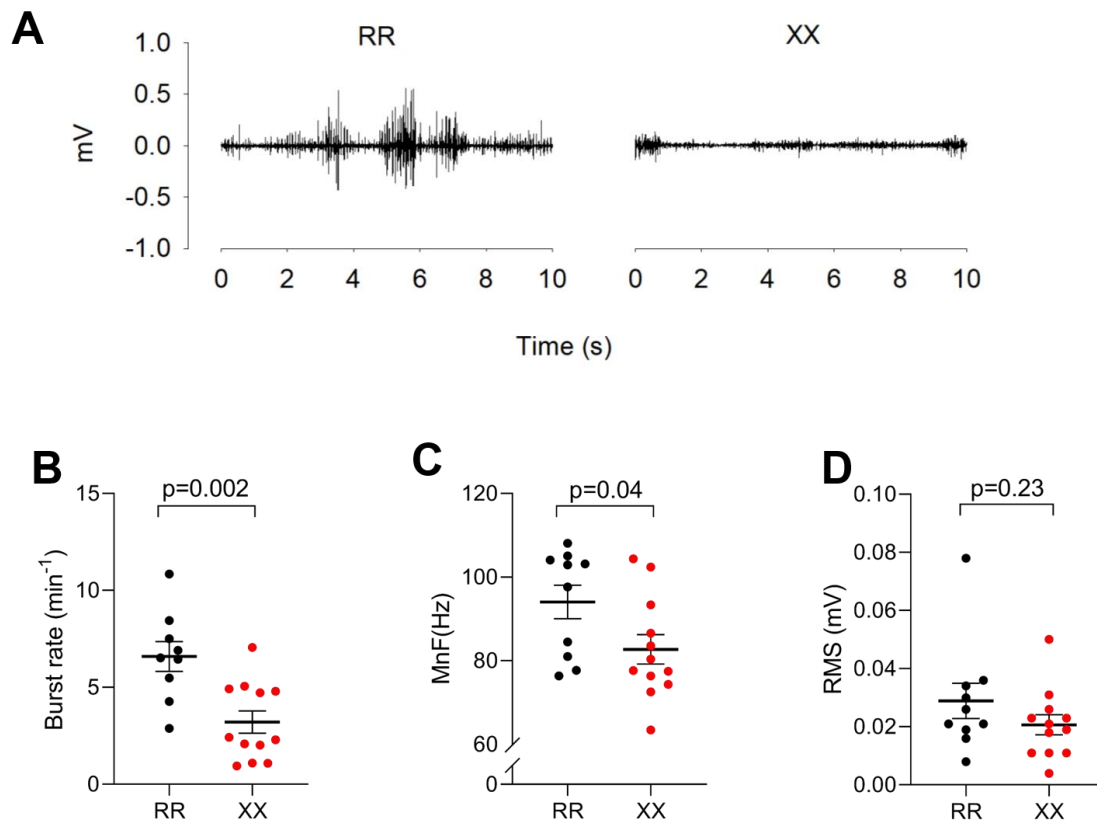

209

210 **Figure 4. Bursting muscle activity rather than increased muscle tone is more prominent in**

211 **RR muscles. A) Representative EMG records from pectoralis major muscles during cold**

212 **exposure showing continuous low-intensity activity in the XX individual and frequent bursts**

213 **of high-intensity activity in the RR individual. Summary data of the burst rate (B), mean**

214 **EMG signal frequency (MnF; C), and amplitude (RMS, root mean square; D). Plots show**

215 **values for each RR (black circles) and XX (red circles) individual and mean  $\pm$  SEM.**

216 **Statistical differences between RR and XX individuals were assessed with unpaired t-test.**

217

218

219

220 In conclusion,  $\alpha$ -actinin-3 deficient humans show improved cold tolerance during cold water  
221 immersion, which is associated with a shift towards more slow-twitch type I MyHC. During  
222 cold exposure, motor neuron activation occurs mainly as an effective heat-generating increase  
223 in muscle tone rather than overt shivering<sup>4</sup>. During prolonged cold exposure, the improved  
224 heat generation via increased muscle tone suggests that XX individuals would consume less  
225 energy and be less susceptible to developing muscle fatigue compared to individuals that  
226 express  $\alpha$ -actinin-3 (RR), providing an evolutionary survival advantage for XX individuals.  
227 This mechanism provides an explanation for the increase in X-allele frequency as modern  
228 humans migrated from Africa to the colder colder Euroasian climate over 50.00 years ago<sup>2,12</sup>.  
229 However, cold tolerance is seldom a key issue in modern societies and an energy efficient  
230 phenotype can be problematic in the context of a current lifestyle with high caloric intake and  
231 reduced physical activity.

232

233

#### 234 **Acknowledgments**

235 We thank Monika Kisieliute and Andreius Subocius for their assistance in genotyping and  
236 collection of human muscle biopsies. We also thank Sophie Agius and Alison Burns for their  
237 contribution to maintaining the *Actn3* KO mouse colony.

238

#### 239 **Author Contribution**

240 TV, MB, HWe conceived the human study. VLW, TV, MS, NI, HP, NE, MB performed  
241 experiments in the human study. VLW, TV, MS, VL, NI, HP, NE, DCA, MB, HWe analysed  
242 and interpreted human data. KNN conceived the *Actn3* KO mouse study. PJH, CFT, HWo  
243 completed the mouse analyses and RNA-sequencing. VLW, PJH, KNN, HWe drafted the  
244 manuscript. All authors provided critical evaluation of the manuscript and approved the final  
245 version.

246

#### 247 **Conflict of interest statement**

248 V.M.L. is founder, CEO, and shareholder of HepaPredict AB. In addition, V.M.L. discloses  
249 consultancy work for EnginZyme AB.

250

## 251 **METHODS**

### 252 ***Participants, mice and ethical approval***

253 **Humans.** Healthy young (18-40 yrs) males were recruited to participate in the study. Before  
254 being included in the study, each participant was informed of the aims, the experimental  
255 procedures and the potential risks of the study and signed a written informed consent form  
256 consistent with the principles outlined in the Declaration of Helsinki. The study was approved  
257 by Kaunas Regional Biomedical Research Ethics Committee (license number BE-2-30).

258 The participants were moderately physically active (< 2 h physical exercise / week)  
259 and did not participate in any formal physical exercise or sport program. They had not been  
260 involved in any temperature manipulation programme or extreme-temperature exposure for at  
261 least 3 months. Individuals with any existing medical condition or taking medication that  
262 could affect natural thermoregulation were excluded from the study. The physical  
263 characteristics of the participants are presented in **Supplementary Table 1**. Their weight (in  
264 kg), body fat percentage (TBF-300 body composition analyser, Tanita, UK Ltd., West  
265 Drayton, UK) and height (in cm) were measured, and body mass index was calculated. Body  
266 surface area (in m<sup>2</sup>) was estimated as previously described using the following formula: body  
267 surface area = 128.1 × Weight<sup>0.44</sup> × Height<sup>0.60</sup> <sup>29</sup>. Skinfold thickness (in mm) was measured with  
268 a skinfold calliper (SH5020, Saehan, Masan, Korea) at 10 sites (chin, subscapular, chest, side,  
269 suprailium, abdomen, triceps, thigh, knee and calf) and the mean subcutaneous fat layer  
270 thickness was calculated <sup>30</sup>.

271

272 ***Actn3 KO and WT mice.*** All animal work was carried out in accordance with approval from  
273 the Murdoch Children's Research Institute Animal Care and Ethics Committee (Approval  
274 No. A760). Animals were housed in a specific pathogen-free environment at a constant  
275 ambient temperature of 22 °C and 50% humidity on a 12 h light-dark cycle, with *ad libitum*  
276 access to food and water, unless otherwise specified. Generation of *Actn3* KO mice on a  
277 C57BL/6J background has been previously reported <sup>31</sup>. Age-matched female WT and *Actn3*  
278 KO littermates derived from heterozygous *Actn3* crosses were used for all animal studies.

279

### 280 ***Genotyping***

281 **Human.** DNA was extracted from blood samples using the NucleoSpin Blood kit (Macherey-  
282 Nagel, GmbH & Co. KG, Düren, Germany) according to the manufacturer's protocol.  
283 *ACTN3* R577X genotype was determined using a PCR-RFLP method as previously described  
284 <sup>32</sup>.

285 **Mouse.** *Actn3* WT and KO genotypes were determined using PCR-RFLP using DNA  
286 extracted from ear punch biopsies and extracted as outlined previously<sup>1</sup>.

287

### 288 *Acute cold exposure*

289 **Human cold-water immersion protocol.** An intermittent whole-body water immersion  
290 cooling protocol was used as previously described<sup>33-35</sup>. All experiments were conducted  
291 indoors at the same time of day (from 7:00 a.m. to 11:00 a.m.). The participants refrained  
292 from consuming any food for at least 12 h before the experiment. To standardize the state of  
293 hydration and the sensation of thirst, subjects were allowed to drink still water as desired until  
294 60 min before the water-immersion session. The experiments were performed at a room  
295 temperature of 22 °C and a relative humidity of 60%. Prior to cold-water immersion, the  
296 participants rested for 10–15 min dressed in a T-shirt, swim shorts and socks and baseline  
297 ventilation parameters, heart rate, and temperatures were measured during the subsequent 20  
298 min. Thereafter, they entered a 14 °C water bath with only the head above the surface.  
299 Individuals stepped out of the bath every 20 min and rested for 10 min at room temperature,  
300 and then returned to the water bath for the next 20 min of cold-water immersion. This  
301 intermittent whole-body water immersion procedure continued until either the rectal  
302 temperature ( $T_{re}$ ) had decreased to 35.5 °C or a maximum of 120 min of cold-water  
303 immersion (170 min including the breaks).

304

305 **Mouse acute thermoneutral and cold exposure.** For acute temperature exposure  
306 experiments, 12 week old female WT and *Actn3* KO mice were singly housed in cages kept  
307 at either 30 °C or 4 °C as previously published<sup>36</sup>. Briefly, mice housed at thermoneutrality  
308 (30 °C) were acclimatised at this temperature for 20 h (with food and water *ad libitum*) prior  
309 to commencement of experiments. Food, water and bedding were removed from cold-  
310 exposed mice during the 5 h cold exposure period.

311

### 312 *Body temperature measurements*

313 **Humans.**  $T_{re}$  was measured throughout the experiment using a thermocouple (Rectal Probe,  
314 Ellab, Hvidovre, Denmark; accuracy  $\pm 0.1$  °C) which was inserted by the subjects to a depth  
315 of 12 cm past the anal sphincter. Muscle ( $T_{mu}$ ) and skin ( $T_{sk}$ ) temperatures were measured  
316 before and at the end of the water immersion session. The  $T_{mu}$  was measured with a needle  
317 microprobe (MKA, Ellab; accuracy  $\pm 0.01$  °C) inserted ~3.5 cm under the skin covering the  
318 lateral gastrocnemius muscle of the right leg. The skin was prepared before each

319 intramuscular temperature measurement by shaving and disinfecting with a cotton-wool  
320 tampon soaked with medicinal alcohol. The insertion area was marked to ensure the  
321 repeatability of the measurement.  $T_{sk}$  was measured with thermistors taped to the back, the  
322 thigh and the forearm (DM852, Ellab; accuracy  $\pm 0.1$  °C), and mean  $T_{sk}$  was calculated as:  
323  $T_{sk}=0.5T_{back}+0.36T_{thigh}+0.14T_{forearm}$ <sup>37</sup>.

324

325 **Mice.** Core body temperature was measured by a rectal probe (BAT-12 microprobe  
326 thermometer) over a 5 hour period between the times of 8:00 and 14:00. Temperatures were  
327 measured at 0, 30, 60, 90, 120, 180, 240, and 300 min. Body weights were recorded before  
328 and after the 5 h temperature measurement period. At the conclusion of the temperature  
329 assessment, all mice were euthanized by cervical dislocation and tissues were collected for  
330 further analysis.

331

### 332 *Human functional measurements*

333 **Spirometry and heart rate measurement.** A mobile spirometry system (Oxycon Mobile,  
334 Jaeger/VIASYS Healthcare, Hoechberg, Germany) was used to measure  $VO_2$  and  $VCO_2$  on a  
335 breath-by-breath basis. Automatic calibration of the gas analyser and delay time were  
336 performed before measurements as described by the manufacturer, i.e. a calibration gas at  
337 180 kPa (15.2%  $O_2$ , 5.02%  $CO_2$ , and 79.62%  $N_2$ ) was supplied to attain gain, offset, and  
338 delay times within 1%. Heart rate was measured throughout the experiment with a heart rate  
339 monitor (S-625X, Polar Electro, Kempele, Finland).

340

341 **EMG measurement of thermoregulatory muscle activation.** Heat-generating muscle  
342 activation is pronounced in the chest region and we therefore measured EMG signals in the  
343 *pectoralis major* muscle during cold-water immersion<sup>38,39</sup>. After careful preparation of the  
344 skin (shaving, abrading, and cleaning with alcohol wipes) to obtain a low impedance ( $< 10$   
345 kOhm), a surface EMG sensor (SX230W, Biometrics Co., Ltd., Gwent, UK) with integrated  
346 bipolar Ag–AgCl electrodes (10 mm diameter, 20 mm centre-to-centre distance) and  
347 differential amplifier (gain 1000, input impedance 100 M $\Omega$ , an input noise  $< 5$   $\mu$ V, common  
348 mode rejection ratio higher than 96 dB) was placed on the right pectoralis major muscle. The  
349 ground electrode (R206, Biometrics Co., Ltd.) was positioned on the wrist of the right hand.  
350 The EMG sensor and ground electrode were connected to a portable data acquisition unit  
351 (DataLog P3X8, Biometrics Co., Ltd.) Before measurements, the channel sensitivity was set  
352 to 3 V and the excitation output to 4600 mV as recommended by the manufacturer. EMG

353 signals were digitized and files were stored on a computer for subsequent analyses of the  
354 mean frequency (MnF, in Hz) and root mean square (RMS, in mV) using a dedicated  
355 software (Biometrics DataLOG, Gwent, UK) and manual analysis of the rate of burst activity.

356

### 357 ***Human protein analyses***

358 **Muscle biopsies.** Prior to cold-water immersion, biopsies from the *vastus lateralis* muscle  
359 were collected from a subgroup of RR (n = 11) and XX (n = 8) individuals. The biopsy site  
360 was cleaned with alcohol and anesthetized locally. After making a small skin cut with a  
361 scalpel tip, a biopsy needle was inserted perpendicular to the muscle fibers and biopsies were  
362 collected with an automatic biopsy device (Bard Biopsy Instrument, Bard Radiology,  
363 Covington, USA). After collection, muscle biopsies were snap frozen in liquid nitrogen and  
364 stored at -80°C until analysis. The skin cut was cleaned and closed with wound closure strips.  
365 Biopsies were not collected post cold exposure.

366

367 **Whole muscle homogenate preparation.** Whole muscle homogenate was prepared from  
368 frozen muscle biopsies for western blots, analysis of MyHC isoform composition, and  
369 immunoprecipitation (IP) experiments. Approximately 15 mg of frozen muscle was weighed  
370 and homogenized on ice (1:20 w/v) in HEPES lysis buffer (20 mM HEPES, 150 mM NaCl, 5  
371 mM EDTA, 25 mM KF, 5% Glycerol, 1 mM Na<sub>3</sub>VO<sub>4</sub>, 0.5% Triton, pH 7.6) with Protease  
372 Inhibitor (#11836145001, Roche, 1 tablet per 50 ml). After this stage, 70 µL was diluted to  
373 33 µg wet weight muscle µl<sup>-1</sup> using 3 × SDS denaturing solution (0.125 M Tris-HCl, 10%  
374 glycerol, 4% SDS, 4 M urea, 10% 2-mercaptoethanol and 0.001% Bromophenol Blue, pH  
375 6.8). Finally, samples were further diluted to 2.5 µg wet weight muscle µl<sup>-1</sup> with 1× SDS  
376 solution (3 × SDS denaturing solution diluted 2:1 with 1 × Tris.Cl (pH 6.8)). A small amount  
377 of undiluted homogenate was taken from each RR participant to make a calibration curve  
378 included on every gel for western blotting. The remaining undiluted homogenate was used for  
379 IP.

380

381 **Single fiber collection, fiber-typing and pooling.** Approximately 10 mg of muscle was  
382 freeze dried for 24 h. Biopsies were left in a desiccator in drying pearls (Sigma) at room  
383 temperature for 60 min and then placed in -20 °C for long-term storage. Between 40-60  
384 segments of single fibers were collected from each muscle biopsy and placed in 12 µl of 1 ×  
385 SDS denaturing solution, once collected fibers were kept at room temperature for 60 min and  
386 then stored in -80 °C until dot blotting.



387 Each single fiber segment was fiber-typed using the dot-blotting method as previously  
388 described<sup>40</sup>. Briefly, a PVDF membrane was activated in 96% ethanol for 120 s and then  
389 activated in transfer buffer containing 20% methanol for 120 s. Following activation, 1  $\mu$ l  
390 from each single fiber tube was spotted on to a membrane. Once the membrane had dried,  
391 membranes were reactivated in ethanol (120 s) and transfer buffer (120 s), membranes were  
392 washed in  $\times$  1 Tris-buffered saline-Tween (TSBT) and then blocked for  $\sim$ 10 min in 5%  
393 blocking buffer (Bio-Rad) in 1  $\times$  TBST. The membrane was then incubated in primary  
394 antibody overnight at 4 °C with 2 h at room temperature . After washing and incubation with  
395 a secondary antibody and 1  $\times$  TBST washes the membrane was coated with  
396 chemiluminescent substrate (Clarity Max ECL substrate, Bio-Rad) and imaged on Chemidoc  
397 MP (Bio-Rad).

398 In this study, two membranes were prepared simultaneously from each fiber segment.  
399 These membranes were probed either for MyHC II (mouse, monoclonal IgG,A4.74,  
400 Developmental Studies Hybridoma Bank (DSHB)) or for MyHC I (mouse, monoclonal IgM,  
401 A4.840, DSHB) diluted 1:200 in blocking buffer in PBS (LiCOR Biosciences) 1:1 v/v in 1x  
402 TBST. Single fiber segments of the same fiber type from each muscle biopsy were  
403 subsequently pooled into a single tube and frozen at -80 °C until western blotting. Each pool  
404 ranged between 4-15 fibers. Only fiber segments that were identified either as MyHC II or  
405 MyHC I were used in subsequent analyses.

406

407 **Western blotting.** Proteins of whole homogenates and pools of single fiber segments were  
408 separated on either 4-15% TGX stain-free gels or for analysis of SLN, 16.5% Tris Tricine  
409 gels. TGX stain-free gels had total protein visualized prior to transfer and analyzed on Image  
410 Lab software (Image Lab 6.0, Bio-Rad)<sup>41</sup>. Protein was wet transferred to PVDF or  
411 nitrocellulose membrane (SLN) for 1 h. Following transfer, tris-tricine gels were stained  
412 (Coomassie Brilliant Blue R-250, Bio-Rad) for 2 h at room temperature and de-stained (40%  
413 methanol, 10% acetic acid) for 2  $\times$  1 h washes at room temperature and then stored overnight  
414 in MilliQ H<sub>2</sub>O before being visualized for myosin bands on a Chemi Doc MP (Biorad).  
415 Membranes were blocked at room temperature for 2 h using LI-COR blocking buffer with  
416 TBS (LI-COR Biosciences). After blocking, membranes were incubated in primary antibody  
417 overnight at 4°C and 2 h at room temperature. Primary antibody details are as follows:  
418 SERCA2a (1:5000, rabbit, A010-20, Badrilla), SERCA1 (1:1000, mouse, CaF2-5D2,  
419 DHSB), CSQ1&2 (1:1000, mouse, MA3-913, Thermofisher), CSQ2 (1:1000, rabbit, ab3516,  
420 Abcam), ACTN3 (1:0000, rabbit, ab68204, Abcam), SLN (1:1000, rabbit, ABT13, Merck

421 Millipore), MyHC II (1:200, mouse IgG, A4.74, DSHB), MyHC I (1:200, Mouse, IgM,  
422 A4.840, DSHB). and actin (1:1000 rabbit, ab1801, Abcam). All antibodies were diluted in  
423 LI-COR blocking buffer in PBS (LI-COR Biosciences) 1:1 v/v with  $1 \times$  TBST. After  
424 incubation in primary antibody, membranes were washed in  $1 \times$  TBST, incubated in  
425 secondary antibody (1:20,000, IRDye 680-conjugated donkey anti-mouse IgG and IRDye  
426 800-conjugated donkey anti-rabbit IgG (926–68,072, 926–32,213), LI-COR Biosciences) and  
427 immunoreactive bands were visualized using infrared fluorescence (IR-Odyssey scanner, LI-  
428 COR Biosciences). Band density was analyzed using Image Studio Lite v 5.2 (LI-COR  
429 Biosciences). During data analysis, the density of each sample for a given protein was  
430 expressed relative to the calibration curve and then normalized to the total protein of each  
431 respective lane. SLN in homogenate was normalized against actin, which was not different  
432 between RR and XX individuals. Single fiber SLN was normalized against Coomassie stain.  
433 The same calibration curve was used across all gels and data are expressed relative to the  
434 average of the RR subjects on each gel, which was set to 1.0.

435

436 **Myosin heavy chain composition.** MyHC composition was determined by electrophoresis  
437 using a protocol adapted from Mizunoya *et al.*<sup>42</sup>. The whole muscle homogenates were  
438 diluted 2.5 times in MilliQ H<sub>2</sub>O and then in  $2 \times$  sample buffer containing 100 mM DTT, 4%  
439 w/v SDS, 0.16 M Tris-HCl (pH 6.8), 43% v/v glycerol and 0.2% bromophenol blue. 10  $\mu$ l of  
440 each sample was loaded on a separating gel consisting of 100 mM glycine, 35% v/v glycerol,  
441 200 mM Tris-HCl (pH 8.8), 0.35% w/v SDS, 8.5% w/v acrylamide-*N,N'*-  
442 methylenebisacrylamide (99:1), 0.1% w/v ammonium persulfate and 0.05% v/v *N,N,N',N'*-  
443 tetramethylethylenediamine. The stacking gel consisted of 10% v/v glycerol, 70 mM Tris-  
444 HCl (pH 6.8), 4 mM EDTA, 0.34% w/v SDS, 4% w/v acrylamide-*N,N'*-  
445 methylenebisacrylamide (99:1), 0.1% w/v ammonium persulfate and 0.05% v/v *N,N,N',N'*-  
446 tetramethylethylenediamine. After adding lower (0.05 M Tris Base, 75 mM glycine, 0.05%  
447 w/v SDS) and upper running buffer ( $6 \times$  concentrated lower running buffer with 0.12% v/v 2-  
448 mercaptoethanol), electrophoresis was run at 4 °C for 40 min at 10 mA and then for 22 h and  
449 20 min at 140 V. After electrophoresis, gels were stained with the SilverXpress Silver  
450 Staining Kit (Invitrogen) according to the manufacturer's instruction. Bands were analyzed  
451 using ImageJ software.

452

453 **Immunoprecipitation.** For IP, 1  $\mu$ g anti-RyR1 (ab2868, Abcam) antibody was bound to 12  
454  $\mu$ L G-protein Dynal® magnetic beads (10007D, Life Technologies) following the

455 manufacturer's instructions. The lysates were centrifuged at 700 g and 4 °C for 10 min and  
456 the protein concentration of the supernatant was determined with the Bio-Rad Protein Assay  
457 (#500-0006). The samples were then diluted to 0.5 µg protein per µl and 400 µl of each  
458 sample was added to the antibody-bead complex. Samples were incubated overnight at 4 °C  
459 under gentle rotation. After incubation, samples gently washed four times with HEPES  
460 buffer. Samples were placed on a magnet rack for removal of buffer. To remove separate  
461 peptides from the beads, 50 µl Laemmli buffer (Bio-Rad) with 5% 2-mercaptoethanol were  
462 added and samples were heated for 5 min at 95 °C. To remove the beads from the solution,  
463 tubes were placed on a magnet and the solution was transferred to fresh tubes. Samples (10  
464 µg / well) were loaded on precast 4-12% Bis-Tris gels (NuPAGE, Invitrogen) and run for 1 h  
465 at 150 V. Proteins were transferred to PVDF membranes for 3 h on ice. After blocking in  
466 blocking buffer (LI-COR) and TBS-T for 1 h, membranes were incubated overnight with  
467 anti-RyR1 (1:5000, mouse, ab2868, Abcam) and anti-FKBP12 (1:1000 rabbit, ab2918,  
468 Abcam) antibodies. After washing with TBS-T, membranes were incubated in secondary  
469 antibody (1:20,000, IRDye 680-conjugated donkey anti-mouse IgG and IRDye 800-  
470 conjugated donkey anti-rabbit IgG (926-68,072, 926-32,213, LI-COR Biosciences) for 1h at  
471 room temperature. Membranes were washed three times with TBS-T and bands were  
472 visualized using an infrared fluorescence scanner (IR-Odyssey, LI-COR Biosciences). Band  
473 densities were analyzed with Image Studio Lite v 5.2 software (LI-COR). Data are expressed  
474 as ratios of FKBP12/RyR1 relative to the group mean of the RR group, which was set to 1.0.

475

#### 476 *Human Proteomics Analysis*

477 **Protein extraction and solubilization.** Vastus lateralis muscle biopsies were homogenized  
478 in 16 µg/ml PBS and briefly centrifuged. After discarding the supernatant, 200 µl lysis buffer  
479 (8M Urea, 1% SDS, 50 mM Tris pH 8.5, Roche protease and phosphatase inhibitor) were  
480 added to the pellet and samples were vortexed and sonicated on ice. Cell lysates were then  
481 centrifuged for 10 min at 4 °C and 15,000 rpm and cleared lysates were transferred to new  
482 tubes. The extracted proteins were precipitated with chilled acetone (1:4 vol) at -20 °C  
483 overnight and then centrifuged for 20 min at 14,000 g at 4 °C. The protein pellets were  
484 dissolved in 40 µl of 8 M urea and a 3 µl aliquot of each sample was diluted 10-fold to BCA-  
485 assay. A volume equivalent of 25 µg of proteins from each sample were adjusted to 43 µl  
486 with water and 5 µl of 1 M ammonium bicarbonate (AmBic) was added.

487

488 **In solution digestion and TMT-labeling.** Proteins were reduced with adding 1.5  $\mu$ l of 200  
489 mM dithiothreitol (DTT, Sigma) in 500 mM AmBic and incubated at 37 °C for 1 h with  
490 shaking at 400 rpm. Alkylation was performed with adding 1.5  $\mu$ l of 66 mM iodoacetamide  
491 (Sigma) in 500 mM AmBic at room temperature for 30 min with shaking at 400 rpm.  
492 Thereafter 1  $\mu$ g of sequencing grade modified Trypsin (Promega) was added to each sample  
493 (1:33 trypsin:protein) and incubated for 16 h at 37 °C. The digestion was stopped by adding  
494 of formic acid at final concentration of 5% and incubating the solution for 20 min at 37 °C.  
495 Then the samples were cleaned on a C18 Hypersep plate (Thermo Scientific), dried using a  
496 Speedvac and re-suspended in 70  $\mu$ l of 50 mM triethylammonium bicarbonate (TEAB) buffer  
497 and 30  $\mu$ l of TMT-10plex (Thermo Scientific) reagent was added in dry acetonitrile (ACN)  
498 following incubation for 2 h at room temperature with shaking at 550 rpm. Labeling reaction  
499 was quenched with 11  $\mu$ l of 5% hydroxylamine. Labeled samples were combined and dried  
500 on Speedvac. Following a cleaning on StageTip C18 20  $\mu$ l of the combined samples were  
501 dissolved in 0.1% formic acid and 2% ACN.

502

503 **PRLC-MS/MS analysis.** Chromatographic separation of peptides was achieved using a 50  
504 cm C18 Easy-C18 column (Thermo Scientific) connected to nanoLC-1000 system (Thermo  
505 Scientific). Approximately 1.3  $\mu$ g peptides were loaded onto the column in a volume of 2  $\mu$ l  
506 and then eluted at a 300 nl / min flow rate for 180 min at a linear gradient from 4% to 26%  
507 ACN in 0.1% formic acid. Orbitrap Q Exactive plus mass spectrometer (Thermo Scientific)  
508 analyzed the eluted peptides that were ionized with electrospray ionization. The survey MS  
509 spectrum was acquired at the resolution of 140,000 in the range of m/z 350-1600. MS/MS  
510 data were obtained with a higher-energy collisional dissociation (HCD) for ions with charge  
511  $z=2-3$  at a resolution of 70,000 using m/z 2 isolation width.

512

513 **Proteomics data analysis.** Data was analyzed on Proteome Discoverer v2.2 (Thermo  
514 Scientific) identifying protein in SwissProt database and the extracted abundances were  
515 further evaluated using an in-house developed R algorithm calculating fold changes and *P*-  
516 values. Data were visualized using Qlucore Omics Explorer (Lund, Sweden).

517

518 ***RNA-sequencing in BAT of Actn3 KO and WT mice.***

519 Brown adipose tissue (BAT) was collected from *Actn3* WT and KO mice after 5 h of core  
520 body temperature analyses across the three treatment groups (Thermoneutral, TN, Room-  
521 temperature, RT, and cold exposed, CE). A total of 18 WT and 16 KO mice underwent RNA

522 sequencing using the Illumina HiSeq 2500 platform as per manufacturer instructions. Raw  
523 read data was processed using the Illumina BaseSpace RNA Express application (Illumina  
524 Inc. 2016). Briefly, sequencing reads were aligned using STAR ultrafast RNA seq aligner<sup>43</sup>  
525 in the SAM file format<sup>44</sup>, then counted using HTSeq<sup>45</sup>. The resulting genewise count data  
526 was analyzed using the R (3.6.0) statistical programming language (R Core Team 2018).  
527 Modelling of differential expression was conducted using the voom precision weights  
528 approach<sup>46</sup> in the limma (3.40.6)<sup>47</sup> package from the Bioconductor (3.9) project.

529

### 530 *Statistics*

531 Statistical analyses were performed using GraphPad Prism 8. Unpaired t-tests were used to  
532 assess statistical significance between the RR and XX group. Mantel-COX log-rank test was  
533 used for comparisons of the effect of cold-water immersion (baseline to end-point). Data are  
534 presented as mean  $\pm$  SEM and  $P \leq 0.05$  was considered statistically significant.

535

536 **REFERENCES**

- 537 1 MacArthur, D. G. *et al.* Loss of ACTN3 gene function alters mouse muscle  
538 metabolism and shows evidence of positive selection in humans. *Nat. Genet.* **39**,  
539 1261-1265 (2007).
- 540 2 Friedlander, S. M. *et al.* ACTN3 allele frequency in humans covaries with global  
541 latitudinal gradient. *PLoS One* **8**, e52282 (2013).
- 542 3 Haman, F. & Blondin, D. P. Shivering thermogenesis in humans: Origin, contribution  
543 and metabolic requirement. *Temperature* **4**, 217-226 (2017).
- 544 4 Lømo, T., Eken, T., Bekkestad Rein, E. & Nja, A. Body temperature control in rats by  
545 muscle tone during rest or sleep. *Acta Physiol.*, e13348 (2019).
- 546 5 Mills, M. *et al.* Differential expression of the actin-binding proteins, alpha-actinin-2  
547 and -3, in different species: implications for the evolution of functional redundancy.  
548 *Hum. Mol. Genet.* **10**, 1335-1346 (2001).
- 549 6 North, K. N. *et al.* A common nonsense mutation results in alpha-actinin-3 deficiency  
550 in the general population. *Nat. Genet.* **21**, 353-354 (1999).
- 551 7 Quinlan, K. G. *et al.* Alpha-actinin-3 deficiency results in reduced glycogen  
552 phosphorylase activity and altered calcium handling in skeletal muscle. *Hum. Mol.*  
553 *Genet.* **19**, 1335-1346 (2010).
- 554 8 Houweling, P. J. *et al.* Is evolutionary loss our gain? The role of ACTN3 p.Arg577Ter  
555 (R577X) genotype in athletic performance, ageing, and disease. *Hum. Mutat.* **39**,  
556 1774-1787 (2018).
- 557 9 Pickering, C. & Kiely, J. ACTN3, morbidity, and healthy aging. *Front. Genet.* **9**, 15  
558 (2018).
- 559 10 Lee, F. X., Houweling, P. J., North, K. N. & Quinlan, K. G. How does alpha-actinin-3  
560 deficiency alter muscle function? Mechanistic insights into ACTN3, the 'gene for  
561 speed'. *Biochim. Biophys. Acta* **1863**, 686-693 (2016).
- 562 11 Del Coso, J. *et al.* More than a 'speed gene': ACTN3 R577X genotype, trainability,  
563 muscle damage, and the risk for injuries. *Eur. J. Appl. Physiol.* **119**, 49-60 (2019).
- 564 12 Amorim, C. E. G., Acuna-Alonzo, V., Salzano, F. M., Bortolini, M. C. & Hunemeier,  
565 T. Differing evolutionary histories of the ACTN3\*R577X polymorphism among the  
566 major human geographic groups. *PloS One* **10**, e0115449 (2015).
- 567 13 Head, S. I. *et al.* Altered Ca<sup>2+</sup> kinetics associated with alpha-actinin-3 deficiency may  
568 explain positive selection for ACTN3 null allele in human evolution. *PLoS Genet* **11**,  
569 e1004862 (2015).
- 570 14 de Meis, L. Role of the sarcoplasmic reticulum Ca<sup>2+</sup>-ATPase on heat production and  
571 thermogenesis. *Biosci. Rep.* **21**, 113-137 (2001).
- 572 15 Bal, N. C., Maurya, S. K., Singh, S., Wehrens, X. H. & Periasamy, M. Increased  
573 reliance on muscle-based thermogenesis upon acute minimization of brown adipose  
574 tissue function. *J. Biol. Chem.* **291**, 17247-17257 (2016).
- 575 16 Nowack, J., Giroud, S., Arnold, W. & Ruf, T. Muscle non-shivering thermogenesis  
576 and its role in the evolution of endothermy. *Front. Physiol.* **8**, 889 (2017).
- 577 17 Rowland, L. A., Bal, N. C. & Periasamy, M. The role of skeletal-muscle-based  
578 thermogenic mechanisms in vertebrate endothermy. *Biol. Rev. Camb. Philos. Soc.* **90**,  
579 1279-1297 (2015).
- 580 18 Periasamy, M. & Kalyanasundaram, A. SERCA pump isoforms: their role in calcium  
581 transport and disease. *Muscle Nerve* **35**, 430-442 (2007).
- 582 19 Schiaffino, S. & Reggiani, C. Fiber types in mammalian skeletal muscles. *Physiol.*  
583 *Rev.* **91**, 1447-1531 (2011).

- 584 20 Lamboley, C. R., Murphy, R. M., McKenna, M. J. & Lamb, G. D. Sarcoplasmic  
585 reticulum  $\text{Ca}^{2+}$  uptake and leak properties, and SERCA isoform expression, in type I  
586 and type II fibres of human skeletal muscle. *J. Physiol.* **592**, 1381-1395 (2014).
- 587 21 Lamboley, C. R., Murphy, R. M., McKenna, M. J. & Lamb, G. D. Endogenous and  
588 maximal sarcoplasmic reticulum calcium content and calsequestrin expression in type  
589 I and type II human skeletal muscle fibres. *J. Physiol.* **591**, 6053-6068 (2013).
- 590 22 Mall, S. *et al.* The presence of sarcolipin results in increased heat production by  $\text{Ca}^{2+}$ -  
591 ATPase. *J. Biol. Chem.* **281**, 36597-36602 (2006).
- 592 23 Aydin, J. *et al.* Nonshivering thermogenesis protects against defective calcium  
593 handling in muscle. *FASEB J.* **22**, 3919-3924 (2008).
- 594 24 Zalk, R. *et al.* Structure of a mammalian ryanodine receptor. *Nature* **517**, 44-49  
595 (2015).
- 596 25 Nedergaard, J. & Cannon, B. Brown adipose tissue as a heat-producing  
597 thermoeffector. *Handb. Clin. Neurol.* **156**, 137-152 (2018).
- 598 26 Ong, F. J. *et al.* Recent advances in the detection of brown adipose tissue in adult  
599 humans: a review. *Clin. Sci.* **132**, 1039-1054 (2018).
- 600 27 Meigal, A. Gross and fine neuromuscular performance at cold shivering. *Int. J.*  
601 *Circumpolar Health* **61**, 163-172 (2002).
- 602 28 Blondin, D. P. *et al.* Inhibition of intracellular triglyceride lipolysis suppresses cold-  
603 induced brown adipose tissue metabolism and increases shivering in humans. *Cell*  
604 *Metab.* **25**, 438-447 (2017).
- 605 29 Tikuisis, P., Jacobs, I., Moroz, D., Vallerand, A. L. & Martineau, L. Comparison of  
606 thermoregulatory responses between men and women immersed in cold water. *J.*  
607 *Appl. Physiol.* **89**, 1403-1411 (2000).
- 608 30 McArdle, W. D., Magel, J. R., Gergley, T. J., Spina, R. J. & Toner, M. M. Thermal  
609 adjustment to cold-water exposure in resting men and women. *J. Appl. Physiol.*  
610 *Respir. Environ. Exerc. Physiol.* **56**, 1565-1571 (1984).
- 611 31 Houweling, P. J. *et al.* Exploring the relationship between  $\alpha$ -actinin-3 deficiency and  
612 obesity in mice and humans. *Int. J. Obes.* **41**, 1154-1157 (2017).
- 613 32 Venckunas, T. *et al.* Human alpha-actinin-3 genotype association with exercise-  
614 induced muscle damage and the repeated-bout effect. *Appl. Physiol. Nutr. Metab.* **37**,  
615 1038-1046 (2012).
- 616 33 Brazaitis, M. *et al.* Two strategies for response to 14 degrees C cold-water immersion:  
617 is there a difference in the response of motor, cognitive, immune and stress markers?  
618 *PLoS One* **9**, e109020 (2014).
- 619 34 Brazaitis, M. *et al.* Brief rewarming blunts hypothermia-induced alterations in  
620 sensation, motor drive and cognition. *Front. Physiol.* **7**, 592 (2016).
- 621 35 Solianik, R., Skurvydas, A., Mickeviciene, D. & Brazaitis, M. Intermittent whole-  
622 body cold immersion induces similar thermal stress but different motor and cognitive  
623 responses between males and females. *Cryobiology* **69**, 323-332 (2014).
- 624 36 Knights, A. J. *et al.* Eosinophil function in adipose tissue is regulated by Krüppel-like  
625 factor 3 (KLF3). *Nat. Commun.* **11**, 2922 (2020).
- 626 37 Lenhardt, R. & Sessler, D. I. Estimation of mean body temperature from mean skin  
627 and core temperature. *Anesthesiology* **105**, 1117-1121 (2006).
- 628 38 van Ooijen, A. M., van Marken Lichtenbelt, W. D., van Steenhoven, A. A. &  
629 Westerterp, K. R. Cold-induced heat production preceding shivering. *Br. J. Nutr.* **93**,  
630 387-391 (2005).
- 631 39 Blondin, D. P. *et al.* Contributions of white and brown adipose tissues and skeletal  
632 muscles to acute cold-induced metabolic responses in healthy men. *J. Physiol.* **593**,  
633 701-714 (2015).

- 634 40 Christiansen, D. *et al.* A fast, reliable and sample-sparing method to identify fibre  
635 types of single muscle fibres. *Sci. Rep.* **9**, 6473 (2019).
- 636 41 Lambole, C. R., Wyckelsma, V. L., McKenna, M. J., Murphy, R. M. & Lamb, G. D.  
637 Ca<sup>2+</sup> leakage out of the sarcoplasmic reticulum is increased in type I skeletal muscle  
638 fibres in aged humans. *J. Physiol.* **594**, 469-481 (2016).
- 639 42 Mizunoya, W., Wakamatsu, J., Tatsumi, R. & Ikeuchi, Y. Protocol for high-resolution  
640 separation of rodent myosin heavy chain isoforms in a mini-gel electrophoresis  
641 system. *Anal. Biochem.* **377**, 111-113 (2008).
- 642 43 Dobin, A. *et al.* STAR: ultrafast universal RNA-seq aligner. *Bioinformatics* **29**, 15-21  
643 (2012).
- 644 44 Li, H. *et al.* The Sequence Alignment/Map format and SAMtools. *Bioinformatics* **25**,  
645 2078-2079 (2009).
- 646 45 Anders, S., Pyl, P. T. & Huber, W. HTSeq--a Python framework to work with high-  
647 throughput sequencing data. *Bioinformatics* **31**, 166-169 (2015).
- 648 46 Law, C. W., Chen, Y., Shi, W. & Smyth, G. K. voom: Precision weights unlock linear  
649 model analysis tools for RNA-seq read counts. *Genome Biol.* **15**, R29 (2014).
- 650 47 Ritchie, M. E. *et al.* limma powers differential expression analyses for RNA-  
651 sequencing and microarray studies. *Nucleic Acids Res.* **43**, e47-e47 (2015).
- 652
- 653



654 **SUPPLEMENTARY RESULTS**

655 Table 1 shows physical characteristics and baseline temperatures of individuals in the RR and  
656 XX groups. RR subjects were slightly younger than XX subjects, whereas no statistically  
657 significant differences were observed for the other measured physical properties or baseline  
658 temperatures.

659

660 **Supplementary Table 1.** Physical characteristics and baseline temperatures of the  
661 individuals in the RR and XX groups.

|                                     | <b>ACTN3 genotype groups</b> |                  |
|-------------------------------------|------------------------------|------------------|
|                                     | <b>RR (n=27)</b>             | <b>XX (n=15)</b> |
| Age, yrs                            | 22 ± 1                       | 28 ± 2*          |
| Height, cm                          | 181 ± 1                      | 183 ± 2          |
| Body weight, kg                     | 77.2 ± 2.5                   | 81.2 ± 3.5       |
| Body surface area, m <sup>2</sup>   | 1.96 ± 0.03                  | 2.01 ± 0.05      |
| Mean skinfold thickness, mm         | 12.1 ± 0.9                   | 14.5 ± 1.3       |
| Body mass index, kg·m <sup>-2</sup> | 23.6 ± 0.6                   | 24.3 ± 0.7       |
| Body fat, %                         | 15.7 ± 1.0                   | 17.9 ± 1.1       |
| Rectal T, °C                        | 36.9 ± 0.1                   | 36.8 ± 0.1       |
| Calf muscle T, °C                   | 35.6 ± 0.1                   | 35.2 ± 0.2       |
| Skin T, °C                          | 32.1 ± 0.1                   | 31.8 ± 0.2       |

662 Values are mean ± SEM. \*  $P < 0.05$  in unpaired t-test.

663

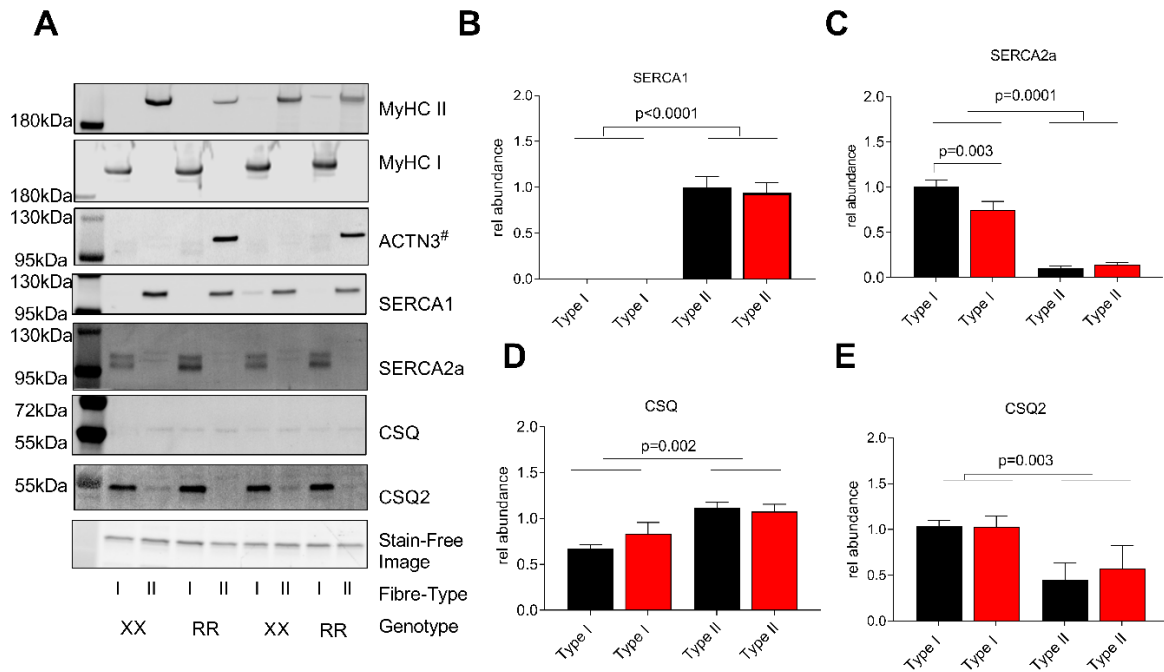

664

665

### 666 **Supplementary Figure 1.**

667 Representative blots (**A**) and summary data of pooled single fiber expression of SERCA1 (**B**),  
668 SERCA2a (**C**), CSQ (**D**), and CSQ2 (**E**). Fibers were identified as either Type I (MyHC I) or  
669 Type II (MyHC II). ACTN3 has a similar molecular weight as both SERCA1 and 2a, hence it  
670 was not possible to probe for ACTN3 on the same membrane as SERCA1 and 2 and an extra  
671 gel was run for ACTN3 (marked with #). Stain free images show the actin prior to transfer,  
672 which was used as a loading control. For each single fiber pool, proteins were normalized  
673 against their own calibration curve (~5-40 $\mu$ g wet weight protein) and total protein and  
674 expressed relative to the mean of the RR fibers, which was set to 1; proteins mainly  
675 expressed in Type I fibers were expressed relative to the mean of the RR Type I fibers and  
676 vice versa for proteins mainly expressed in Type II fibers. Data are presented as mean  $\pm$   
677 SEM. Differences between RR and XX were determined by one-way ANOVA with Tukey's  
678 *post hoc* test.

679

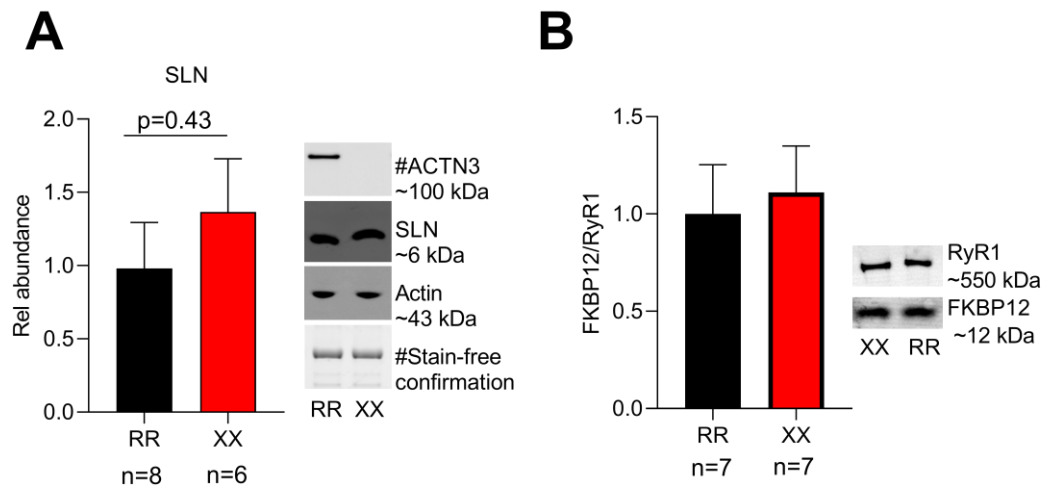

680

681

### 682 **Supplementary Figure 2.**

683 Summary data (mean  $\pm$  SEM) and representative whole muscle homogenate western blots of  
684 SLN (**A**) and FKBP12 associated with RyR1 (**B**). Band intensities in **A** were normalized to  
685 their respective actin stain-free loading controls; # in **A** indicates a separate gel from that of  
686 SLN (qualitatively similar results obtained with actin on same gel used as loading control).  
687 Data are expressed relative to the mean value of the RR group, which was set to 1.0. No  
688 statistical difference ( $P > 0.05$ ) in SLN expression or FKBP12 associated with RyR1 between  
689 RR and XX individuals were observed with unpaired t-test.

690

691

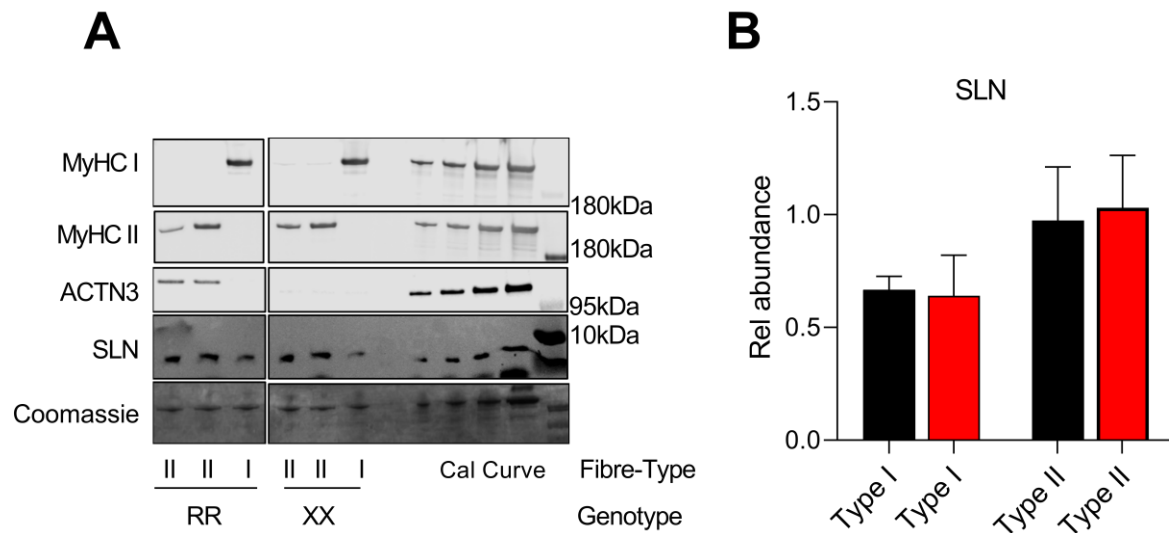

692

693

694 **Supplementary Figure 3.**

695 **A)** Representative blots for analysis of SLN protein expression in pooled single fibers. SLN  
696 was run on a 16.5% Tris Glycine Gel and Coomassie stained after transfer for loading  
697 control. The two MyHC isoforms and ACTN3 were run on two different gels, loaded  
698 identical to those described for SLN. Fibers are identified as either Type I (MyHC I), Type II  
699 (MyHC II). **B)** For each single fiber pool, SLN was normalized against its own calibration  
700 curve and protein content and expressed relative to the mean of the RR MyHC II, which was  
701 set to 1. Data are shown as mean  $\pm$  SEM.

702
